# Supplementary material for: Mir-331-3p Inhibits PRRSV-2 Replication and Lung Injury by Targeting PRRSV-2 ORF1b and Porcine TNF-α
Source: Front Immunol. 2020 Sep 25;11:547144. doi: 10.3389/fimmu.2020.547144 (PMC7544944; doi:10.3389/fimmu.2020.547144)
Supplement: Supplementary Table 3 — Quantitative RT-PCR primer sequences used in this study. [file Table_3.XLSX]

## Sheet: Sheet1
Table S3 Quantitative RT-PCR primer sequences used in this study
ORF7-F	TCAGCTGTGCCAAATGCTGG
ORF7-R	AAATGGGGCTTCTCCGGGTTTTT
Probe-ORF7	TCCCGGTCCCTTGCCTCTGGA
β-actin-F	TCATCACCATTGGCATGAG
β-actin-R	AGCACTGTGTTGGCGTACAG
Ssc-mir-210-F	ACACTCCAGCTGGGCTGTGCGTGTGACA
Ssc-mir-331-3p-F	TAGCCCCTGGGCCTATCCTAGAACT
Universal primer-R	TCAACTGGTGTCGTGGAGTCGGC
U6-F	GCTTCGGCAGCACATATACT
U6-R	TTCACGAATTTGCGTGTCAT
MX1-F	GATGCCCTCTTGTGCTGAAAT
MX1-R	TGATGCCAGGAAGGTCTATG
TNF-F	CGTTGTAGCCAATGTCAAAGCC
TNF-R	TGCCCAGATTCAGCAAAGTCCA
STAT1-F	CACGCTGCCAATGATGTTTC
STAT1-R	ATCTGTATTGGGTCTTCTTG
CSF1-F	GAGACAACACTCCCAATGC
CSF1-R	AGAAAGTTCGGACACAGGC
MAF-F	AGAAGAGGCGGACCCTGAAA
MAF-R	AAAAACTCGGGAGAGGACGG
DIMT1-F	GCCATTCTTTGATGCTTGTGT
DIMT1-R	TGGGAGGTGGTCTGAAGTTAT
STMN1-F	TTCAGTAAAATGGCGGAGG
STMN1-R	CTTCAGTCTCATCAGCAGGG
TNFAIP1-F	TGCTGCTGGTCCTTCTACGG
TNFAIP1-R	CTCCTCGTCTTCACTGGGGG
SOCS1-F	CCAGGTGGCAGCCGACAAT
SOCS1-R	CCCCCAGTAGAAGCCGCAG
VAV2-F	CTCGTCTGTGAAGCCCTGTC
VAV2-R	TTCGTCGTTGAACTTGATGC
IFNLR1-F	TGGAAGGAAGGTGCCAGAAAC
IFNLR1-R	GCAACAGTGGTGGGAGGGAA
CD151-F	AAGGCGAACCTGAAGGACAC
CD151-R	TAGATGTTGGAGGCGTGGTC
CD226-F	ATGGTTGGAGGAGCAGC
CD226-R	GAAGGTTGGGTAGTTGA
ICAM-1-F	CAGTGTTGCCTGTGATGGAAA
ICAM-1-R	CTTCAGTCTTGTGCCAGTGAGTCT
MCP-1-F	CCAGCAGCAAGTGTCCTAAAG
MCP-1-R	TTTTCTTGTCCAGGTGGCTTAT
VCAM-1-F	TCTGAATGAAAAGTGAAAAC
VCAM-1-R	GACACCTGACTGTAACTGGCT
ORF1b-F	TACCACACCCACTTCCACCAGC
ORF1b-R	TGCCACGCCTAACGGAGACTAA
TLR7-F	CCAACCTCACCCTCACCATT
TLR7-R	AATCTGCTGCCTTCTGGTGC
VHL-F	CCGCCGCATCCACAGTTAC
VHL-R	GGCATCGTTCTTTCAGGGT
TNFRSF12A-F	CGACCGCACAGCGACTT
TNFRSF12A-R	CAGACCAGGAAGCCAGAAA
IL6R-F	CACGCAGGCACCTACCACT
IL6R-R	CTGTCCCAAGGAATACGG
TNFRSF18-F	AGACGGACTGCGAGTGTATC
TNFRSF12-R	GTGGTGAGAAACCCAAACTG
CD248-F	ACCTTGGTGACGAGTTGCTG
CD248-R	ACTGAGGAGTGGTAGGGGAC
SCARA3-F	GGTGGAGAGATTTGAGACGCT
SCARA3-R	GGAGACGGACTTGTTCAGGTAG
E2F3-F	GTGCCTGACCCAATAGAGAGCC
E2F3-R	AAAGGAGAAAGGTTTGCCATAGAA
